1 **Post-traumatic osteoarthritis development is not modified by postnatal chondrocyte deletion of**  
2 **CCN2.**

3

4 Craig M Keenan<sup>1</sup>, Lorenzo Ramos-Mucci<sup>1</sup>, Ioannis Kanakis<sup>1</sup>, Peter I Milner<sup>1</sup>, Andrew Leask<sup>2</sup>, David  
5 Abraham<sup>3</sup>, George Bou-Gharios<sup>1</sup>, Blandine Poulet<sup>1\*</sup>.

6 <sup>1</sup>Department of Musculoskeletal Biology, Institute of Ageing and Chronic Disease, University of  
7 Liverpool, William Henry Duncan Building, West Derby Street, Liverpool, L7 8TX, UK.

8 <sup>2</sup>Department of Dentistry, Western University, Dental Sciences Building, London, ON, Canada.

9 <sup>3</sup>Centre for Rheumatology and Connective Tissue Diseases, University College London, London, UK.

10

11 Corresponding Author: Dr Blandine Poulet, [b.poulet@liverpool.ac.uk](mailto:b.poulet@liverpool.ac.uk); Department of Musculoskeletal  
12 Biology, Institute of Ageing and Chronic Disease, University of Liverpool, William Henry Duncan  
13 Building, 6 West Derby Street, L7 8TX, Liverpool, UK.

14

15

16

17

18

19

20

21

22

23

24

25

26

27 **Key words:** Osteoarthritis, CCN2, cartilage, post-traumatic, trauma-induced, transgenic mouse.

28 **Abstract**

29 CCN2 is a matricellular protein involved in several critical biological processes. In particular, CCN2 is  
30 involved in cartilage development and in osteoarthritis. CCN2 null mice exhibit a range of skeletal  
31 dysmorphisms, highlighting its importance in regulating matrix formation during development,  
32 however its role in adult cartilage remains unclear. The aim of this study was to determine the role of  
33 CCN2 in postnatal chondrocytes in models of post-traumatic osteoarthritis (PTOA). CCN2 deletion was  
34 induced in articular chondrocytes of male transgenic mice at 8 weeks of age. PTOA was induced in  
35 knees either surgically or non-invasively by repetitive mechanical loading at 10 weeks of age. Knee  
36 joints were harvested, scanned with micro-CT, and processed for histology. Sections were stained with  
37 toluidine blue and scored using the OARSI grading system. In the non-invasive model cartilage lesions  
38 were present in the lateral femur but no significant differences were observed between wildtype (WT)  
39 and CCN2 knockout (KO) mice 6 weeks post-loading. In the surgical model, severe cartilage  
40 degeneration was observed in the medial compartments but no significant differences were observed  
41 between WT and CCN2 KO mice at 2, 4, and 8 weeks post-surgery. We conclude that CCN2 deletion in  
42 chondrocytes did not modify the development of PTOA in mice, suggesting that chondrocyte  
43 expression of CCN2 in adults is not a critical player in protecting cartilage from the degeneration  
44 associated with PTOA.

45

46 **Summary Statement**

47 Post-natal deletion of CCN2 in chondrocytes does not affect the development of post-traumatic  
48 osteoarthritis in mice.

49 **Introduction:**

50 Osteoarthritis (OA) is a major chronic degenerative disease of the joint, with limited therapies  
51 available to inhibit or slow disease progression. Mechanical trauma represents a major risk factor for  
52 OA with mouse models of post-traumatic OA (PTOA) widely used to study OA development. These  
53 include surgical models for various OA severity development (Kamekura et al., 2005) and non-invasive  
54 repetitive joint trauma model including the one established by Poulet *et al* (Poulet et al., 2011). Both  
55 models show similar hallmarks as seen in human OA, including progressive articular cartilage  
56 degradation, subchondral bone sclerosis, osteophyte formation and synovial fibrosis and activation.  
57 In this study, we used both a surgical model and a non-invasive model to determine the role of the  
58 matricellular protein CCN2 in severe and moderate PTOA severities.

59 CCN2, also known as Connective tissue growth factor (CTGF), is a matricellular protein involved in key  
60 cellular functions including proliferation, adhesion and differentiation (Kubota and Takigawa, 2015),  
61 along with several complex biological processes including chondrogenesis (Perbal, 2004). Deletion of  
62 CCN2 during development demonstrated its essential role as a regulator of skeletal development by  
63 promoting endochondral ossification through the proliferation and differentiation of growth plate  
64 chondrocytes (Shimo et al., 2000, Takigawa et al., 2003). In addition, CCN2 has been suggested as a  
65 potential cartilage repair factor (Nishida et al., 2004); continuous cartilage-specific overexpression of  
66 CCN2 has been shown to protect joints from age-related OA development, highlighting a chondro-  
67 protective role of CCN2 (Itoh et al., 2013).

68 CCN2 is expressed in adult articular cartilage, albeit at low levels (Tang et al., 2018, Nishida et al.,  
69 2004), and its expression significantly increases in OA chondrocytes (Omoto et al., 2004). However,  
70 the role of chondrocyte-specific expression of CCN2 in OA is still unknown. There is evidence that CCN2  
71 may be involved in the pathogenesis of OA as CCN2 overexpression in the synovial lining of mouse  
72 knee joints resulted in the development of transient fibrosis and cartilage damage (Davidson et al.,  
73 2006). In an inducible KO model, global deletion of CCN2 postnatally resulted in protection from  
74 surgically induced OA (Tang et al., 2018), which suggests a negative role for CCN2 in OA. These  
75 contradictory roles of CCN2 in joint health and OA clearly need to be further explored. Therefore, to  
76 understand the importance of CCN2 in adult cartilage, we examined the effect of postnatal CCN2  
77 deletion specifically in chondrocytes using two models of PTOA.

78 **Materials and Methods:**

79 **Animals**

80 All work was carried out in accordance with the UK Home Office guidelines and regulations under the  
81 Animals (Scientific Procedures) Act 1986. All mice (C57CBA background) were housed in the specific  
82 pathogen free biological services unit at the University of Liverpool, UK and housed in cages of up to  
83 5 mice, with 12h light/dark cycle, and ad libitum food and drink. Using chondrocyte specific aggrecan  
84 (Acan) enhancers, two conditional CCN2 KO mouse models were generated. The first contained an  
85 Acan -10kb CreER<sup>T2</sup> enhancer as described by Han and Lefebvre (Han and Lefebvre, 2008). This  
86 produced Acan -10kb CreER<sup>T2</sup> x CCN2<sup>fl/fl</sup> mice in which CCN2 was deleted from articular chondrocytes.  
87 The second contained an Acan -30kb CreER<sup>T2</sup> enhancer described by Li *et al* (Li et al., 2018). This  
88 produced Acan -30kb CreER<sup>T2</sup> x CCN2<sup>fl/fl</sup> mice where CCN2 was deleted from all chondrocytes. Deletion  
89 of CCN2 was regulated using a tamoxifen inducible CreER<sup>T2</sup>.

#### 90 **Tamoxifen induction of Acan CreER<sup>T2</sup>**

91 Prior to the start of all *in vivo* experiments, deletion of CCN2 or STOP in reporter td Tomato using Acan  
92 CreER<sup>T2</sup> was induced at 8 weeks of age using tamoxifen (Sigma Aldrich, UK). All mice, whether WT or  
93 CCN2<sup>fl/fl</sup>, were administered tamoxifen intraperitoneally at a dose of 1mg/10g body weight on days 1,  
94 3, and 5, and were weighed prior to injection on each day. Following tamoxifen injections, mice were  
95 left for 1 week before any experimental work commenced. Td tomato mice were sacrificed four weeks  
96 after last tamoxifen injection.

#### 97 **Non-invasive mechanical loading model of PTOA.**

98 Right knees of 10 week-old male Acan -30kb CreER<sup>T2</sup> x CCN2<sup>fl/fl</sup> (n = 13 (Cre<sup>WT</sup>), n = 14 (Cre<sup>+/-o</sup>)) mice  
99 were loaded non-invasively, using a model previously described (Poulet et al., 2011) to induce PTOA.  
100 Briefly, mice were anaesthetised and the right leg placed in custom-made cups with the knee in  
101 flexion. A peak load of 9N was applied for 0.05 seconds, with a rise and fall time of 0.025 seconds, and  
102 a baseline hold time of 9.9 seconds for 40 cycles. A baseline load of 2N was employed to keep the tibia  
103 in place during peak loading. All mice were subjected to this pattern 3 times per week for 2 weeks.  
104 Loading was performed using an ElectroForce 3100 (TA Instruments, USA). Mice were weighed after  
105 each loading episode, and on a weekly basis following completion of the loading regimen. All mice  
106 were sacrificed 6 weeks post-loading and samples prepared for micro-CT and histological analysis.

107

#### 108 **Surgical model of PTOA**

109 Left knee joints of 10-week-old Acan -10kb CreER<sup>T2</sup> x CCN2<sup>fl/fl</sup> mice underwent surgical transection of  
110 the medial meniscus (MM) and the medial meniscotibial ligament (MMTL). Mice were induced and  
111 maintained under a plane of general anaesthesia using isoflurane during the surgical procedure.. A

112 small incision was made over the medial aspect of the patella tendon and the joint capsule incised.  
113 Using blunt dissection small amounts of fat were removed allowing for visualisation of the MM and  
114 MMTL. Using a scalpel, the MM and MMTL were transected using an upwards motion from the cranial  
115 horn of the MM on the proximal tibial plateau. Once transected the joint capsule and the skin were  
116 sutured. Mice were immediately transferred to a heated post-operative recovery room. They were  
117 monitored daily to ensure they were in good health. Mice were sacrificed 2 weeks post-op (n = 4  
118 (Cre<sup>WT</sup>), n = 14 (Cre<sup>+o</sup>)), 4 weeks post-op (n = 7 (Cre<sup>WT</sup>), n = 7 (Cre<sup>+o</sup>)), and 8 weeks post-op (n = 7  
119 (Cre<sup>WT</sup>), n = 8 (Cre<sup>+o</sup>)). Samples were prepared for micro-CT and histological analysis.

## 120 **Specimen preparation**

121 All animals were sacrificed by cervical dislocation. Experimental and contralateral joints were  
122 dissected, immediately fixed in 10% neutral buffered formalin for 24hrs and transferred to 70%  
123 ethanol for storage.

## 124 **Micro-CT analysis**

125 Experimental and contralateral joints were scanned at a resolution of 4.5µm using a 0.25mm  
126 aluminium filter, with a rotation step of 0.6° (Skyscan 1272, Bruker microCT, Belgium). Image  
127 reconstruction was performed using NRecon software (Bruker microCT, Belgium), followed by manual  
128 selection of regions of interest for tibial and femoral epiphysis, and joint space (including menisci).  
129 Bone volume/tissue volume (BV/TV) and tissue volume (TV) were determined. Data were tested for  
130 normality and Student's t-test was used for statistical evaluation with significance set at P<0.05.

## 131 **Histological analysis**

132 Samples were decalcified in either 10% ethylenediaminetetraacetic acid (EDTA) (Sigma Aldrich, UK)  
133 for 2 weeks or 10% formic acid (Sigma Aldrich, UK) for 1 week. Once decalcified, samples were given  
134 a processing number independent of their genotype, processed, paraffin embedded in either the  
135 coronal (surgical model) or sagittal plane (loading model), and 6µm sections were taken throughout  
136 the entire joint. Sections across the joint at 120µm intervals were stained with toluidine blue/fast  
137 green (0.04% in 0.1M sodium acetate buffer, pH 4.0) and cartilage lesion severity graded using the  
138 OARSI histopathology initiative scoring method (Glasson et al., 2010). Grading each of the four  
139 compartments of the tibio-femoral joint (lateral and medial tibia and femur) throughout the entire  
140 joint allowed for the determination of a maximum lesion grade (most severe lesion) for the whole  
141 joint and each individual compartment. The mean score, which involved determining the average  
142 grade across multiple slides was calculated for each joint and each compartment (Poulet et al., 2011).  
143 The summed score was determined by adding together the maximum score of each compartment per

144 joint. Osteophyte formation was graded histologically using the scale described by Kamekura *et al*  
145 (Kamekura et al., 2005). Statistical analysis was performed using a Mann-Whitney test. Data are  
146 presented as box plots of interquartile range, median, minimum and maximum and showing all  
147 individuals.

#### 148 **Cryosectioning**

149 Samples were dissected, fixed in 4% paraformaldehyde at 4°C for 24hrs, decalcified in 10% EDTA for 2  
150 weeks, embedded using OCT embedding media (Tissue-Tek, Sakura Europe) in either the coronal (WT)  
151 or sagittal (Cre<sup>+/-</sup>) plane, and stored at -80°C until required. Sections were taken at 5µm until the  
152 middle of the joint was reached. A section showing the entire tibio-femoral joint was then collected  
153 and stained with Hoechst stain for 30 mins. Images were obtained using a Zeiss Axio Observer  
154 apotome microscope (Zeiss, Germany).

155

#### 156 **Results:**

##### 157 **CCN2 was successfully deleted in chondrocytes in adult mice.**

158 To verify that deletion of CCN2 in chondrocytes had occurred in response to tamoxifen injection, a  
159 tail-tip was taken post-cull from each individual mouse, and PCR performed on extracted genomic  
160 DNA for genetic recombination and exon deletion. All mice contained a 1000bp band corresponding  
161 to the floxed-CCN2 allele, and Cre<sup>+/-</sup> mice contained an additional band at around 500bp  
162 corresponding to the allele generated by Cre-recombination resulting in the Cre-mediated deletion of  
163 CCN2 (Fig. 1). Cre<sup>WT</sup> mice showed no recombination. To validate the efficiency of the CreER<sup>T2</sup> system  
164 and the subsequent deletion of the transgene in these new Acan -30kb CreER<sup>T2</sup> mice, CCN2<sup>fl/fl</sup> with  
165 Cre<sup>+/-</sup> (CCN2 KO) mice were crossed with a tdTomato reporter mouse, which enabled detection of  
166 recombined CreER<sup>T2</sup> via fluorescence, following administration of tamoxifen to the mice. In control  
167 corn oil treated mice, no tdTomato was seen in the whole joint cells (only a chondrocyte was positive;  
168 Fig. 1), demonstrating no recombination of CreER<sup>T2</sup> occurred. Following tamoxifen treatment, there  
169 was clear recombination of CreER<sup>T2</sup> as evident by the intense expression of tdTomato protein in all  
170 chondrocytes located in both the articular cartilage and the growth plate (Fig. 1).

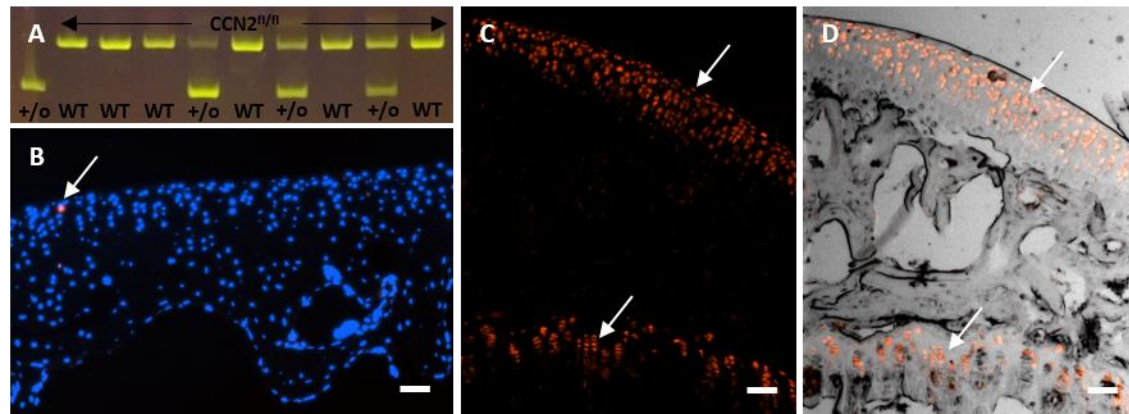

171

172 Figure 1: Confirmation of Cre recombination and CCN2<sup>fl/fl</sup> transgene deletion in chondrocytes in -30kb  
173 Acan CreER<sup>T2</sup> adult mice. (A) Genotyping from tail tips genomic DNA from WT and CCN2 Cre<sup>+o</sup> mice  
174 showed the presence of the CCN2 flox product in all mice (first band) and the additional lower band  
175 in Cre<sup>+o</sup> mice only (+/o) around 500bp in size confirming Cre recombination and deletion of the CCN2  
176 floxed product. (B, C, & D) Histological images of the tibial epiphysis in CCN2 Cre<sup>+o</sup> crossed with the  
177 tdTomato reporter mouse 4 weeks after the last corn oil control (B) or tamoxifen injection (C-D). Corn  
178 oil treatment showed no recombination (except one single chondrocyte red; arrow B; blue staining of  
179 nuclei with Hoechst stain). (C-D) Tamoxifen treatment showed expression of tdTomato fluorescence  
180 (red) in chondrocytes throughout the articular cartilage and growth plate (top and bottom arrows  
181 respectively). Scale bar = 100µm.

182

### 183 **Conditional CCN2 deletion in chondrocytes does not prevent the development of osteoarthritis in a** 184 **non-invasive loading model of trauma-induced OA**

185 Mice (CCN2 KO and WT) were treated with tamoxifen then mechanically loaded to induce PTOA.  
186 Histological examination of the loaded limb in both WT (n=13) and CCN2 KO (n=14) mice showed the  
187 development of OA lesions with loss of hyaline articular cartilage and exposure of the articular  
188 calcified cartilage primarily in the lateral femur (Fig. 2). Assessment of the severity of the lesions in  
189 each compartment throughout the entire tibio-femoral joint (medial and lateral, tibia and femur)  
190 showed no significant differences in the AC lesion mean, maximum, and summed severity scores  
191 between WT and CCN2 KO mice. MicroCT analysis of the lateral femur and tibia epiphyseal bone  
192 showed no differences in BV/TV between WT and KO (Fig. 2). Together, these data indicate that  
193 deletion of CCN2 postnatally from aggrecan-expressing chondrocytes had no effect on the  
194 development of OA in a non-invasive model of moderate PTOA.

195

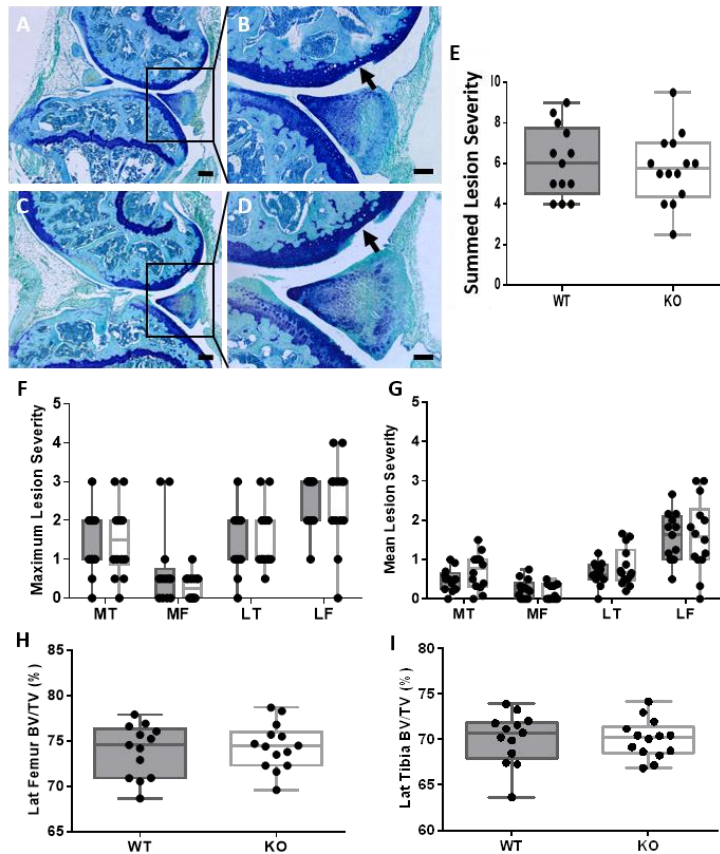

196

197 Figure 2: Deletion of CCN2 in chondrocytes does not prevent OA development in a non-invasive  
198 loading model of PTOA. (A-D) Toluidine blue stained sections of the tibio-femoral joint of WT (A,B) and  
199 CCN2<sup>fl/fl</sup> KO (C,D) mice showed development of AC lesions localized to the lateral femur in loaded knee  
200 joints (arrowed). (E-G) AC lesion severity scores across the whole knee joint showed no differences  
201 between WT and CCN2<sup>fl/fl</sup> KO mice in (E) summed maximum scores nor in (F) maximum and (G) mean  
202 lesion severity scores for each joint compartment. (H, I) BV/TV of the epiphyseal bone in the lateral  
203 femur (H) and lateral tibia (I) showed no significant difference in bone structure between WT and  
204 CCN2<sup>fl/fl</sup> KO. (MT = medial tibia, MF = medial femur; LT = lateral tibia; LF = lateral femur). Scale bar =  
205 200 $\mu$ m (A,C) and 100 $\mu$ m (B,D).

206

207 **CCN2 deletion specifically in chondrocytes does not prevent the development of osteoarthritis in a**  
208 **surgical model of severe PTOA.**

209 To confirm that deletion of CCN2 in chondrocytes of adult mice had no effect on OA, a second model  
210 of PTOA was used. This model incorporated a different Cre (Acan -10kb CreER<sup>T2</sup>) which had been  
211 previously shown to express in articular chondrocytes (Han and Lefebvre, 2008). At 2 weeks post-  
212 surgery, moderate AC lesions were already visible in the medial compartment of both WT and CCN2



213 KO mice with exposure of the underlying calcified cartilage (Fig. 3). At 4 weeks post-surgery, the  
214 damage was extensive with both WT and CCN2 KO suffering substantial loss of articular cartilage in  
215 the medial compartment of the tibio-femoral joint. By 8 weeks post-surgery there was widespread,  
216 significant damage across the entire medial side of the tibio-femoral joint in both WT and CCN2 KO  
217 mice, including near-complete loss of AC. Cartilage lesion scoring showed no significant differences  
218 between WT and CCN2 KO at all time-points.

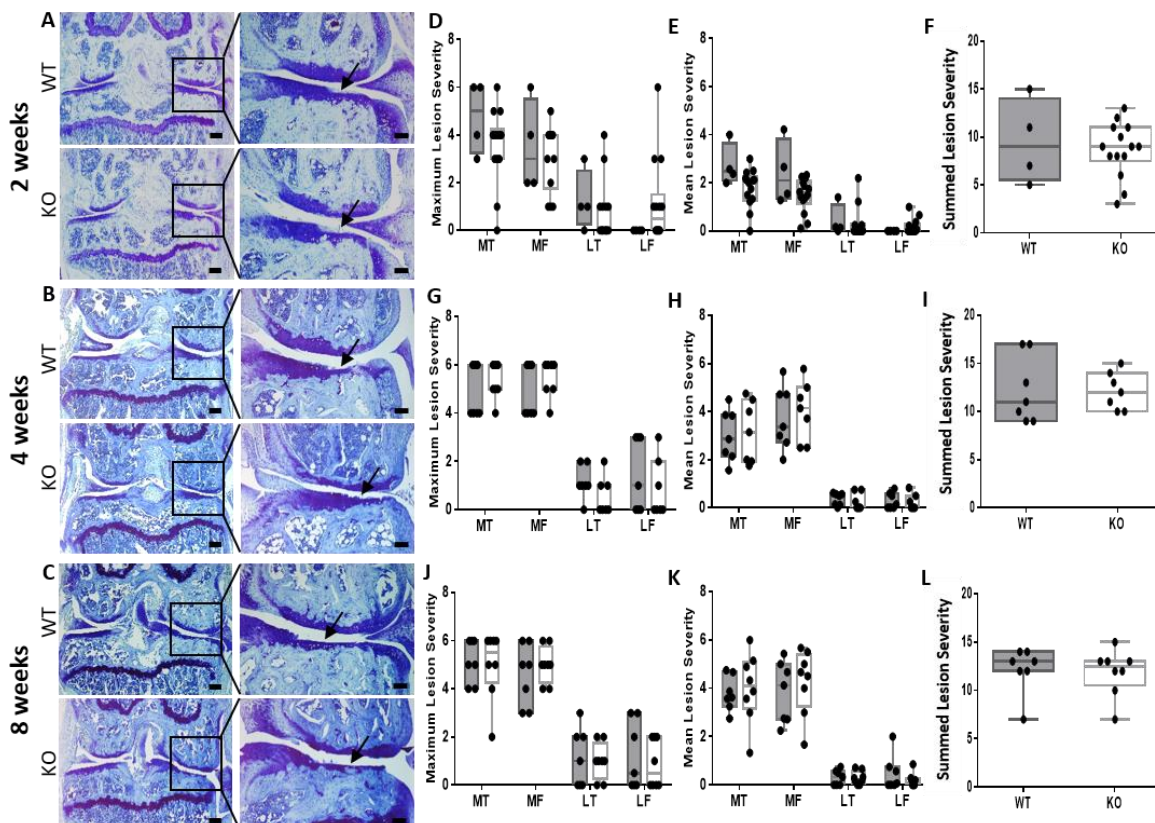

219

220 Figure 3: Deletion of CCN2 in chondrocytes does not prevent AC lesion severity in a surgical model of  
221 severe PTOA. (A-C) Toluidine blue stained sections from WT and CCN2<sup>fl/fl</sup> KO mice 2, 4 and 8 weeks  
222 post-surgery showed development of OA on the medial tibia (arrows) in both WT (top panel) and  
223 CCN2<sup>fl/fl</sup> KO (bottom). (D-L) Maximum and mean lesion severity in each individual joint compartment  
224 and summed maximum scores showed no significant difference between OA severity in WT and  
225 CCN2<sup>fl/fl</sup> KO mice at (D-F) 2 weeks, (G-I) 4 weeks, and (J-L) 8 weeks post-surgery. (MT = medial tibia,  
226 MF = medial femur; LT = lateral tibia; LF = lateral femur). Scale bar = 200µm (A, B, & C left panels),  
227 100µm (A, B, & C right panels).

228

229 Osteophyte formation was observed at 2 weeks post-surgery in WT and CCN2 KO mice (Fig. 4) and  
230 advanced to fully ossified osteophytes at 4- and 8-weeks post-surgery (Fig. 4), with no significant

231 differences observed between WT and CCN2 KO mice at all time-points. Data generated from the  
232 surgical injury model of OA suggest that deletion of CCN2 in chondrocytes postnatally shows no  
233 difference in PTOA development

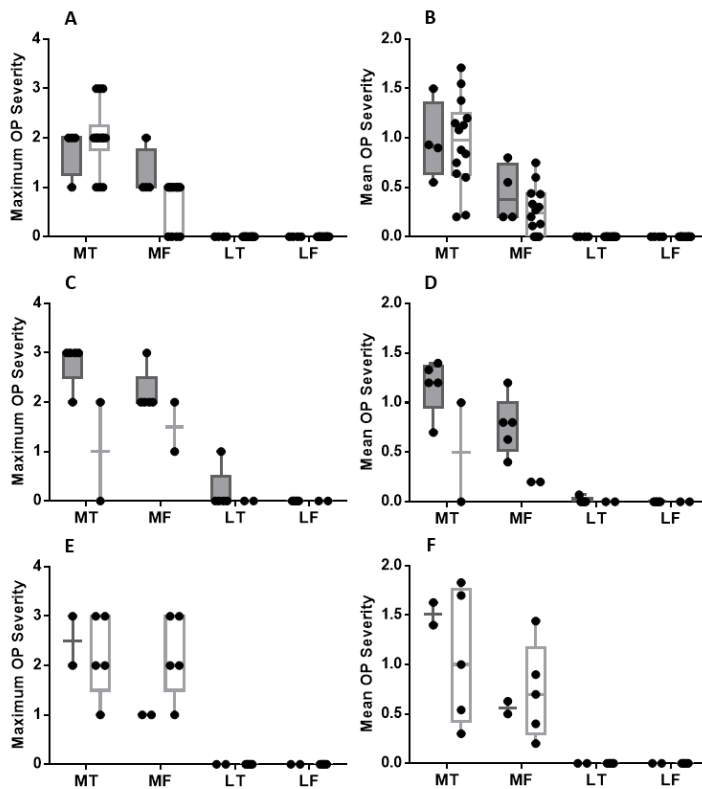

234

235

236 Figure 4: Deletion of CCN2 in chondrocytes does not affect osteophyte maturity in a surgical model of  
237 PTOA. Maximum and mean osteophyte severity scores across all knee joint compartments showed no  
238 significant differences between WT and CCN2<sup>fl/fl</sup> KO mice at 2 weeks (A-B), 4 weeks (C-D) and 8 weeks  
239 (E-F) post-surgery.

240

#### 241 Discussion:

242 This study aimed to determine the postnatal role of CCN2 in articular cartilage during PTOA in two  
243 different models. We have found that despite its importance during skeletal development and its  
244 increased expression by OA chondrocytes, CCN2 in articular cartilage chondrocytes in adult joints did  
245 not play a significant role in preventing PTOA development.

246 A number of studies have focused on the regenerative ability of CCN2 due to its role in cellular  
247 proliferation and differentiation (Takigawa et al., 2003, Shimo et al., 2000). Its role in chondrogenesis

248 highlighted its potential as a possible regenerative therapy for the treatment of OA, particularly as  
249 exogenously added rCCN2 did not stimulate hypertrophy of chondrocytes *in vitro* (Nishida et al., 2002).  
250 Moreover, treatment of articular cartilage defects with rCCN2 showed repaired cartilage to be  
251 structurally similar to healthy articular cartilage (Nishida et al., 2004). A recent study by Tang and  
252 colleagues showed that a postnatally induced global deletion of CCN2 caused a thickening of cartilage  
253 that resulted in protection from ageing-induced OA (Tang et al., 2018). Since postnatal global deletion  
254 of CCN2 impeded OA development, it was hypothesised that postnatal chondrocyte-specific deletion  
255 of CCN2 would also protect cartilage from the development of OA following trauma.

256

257 The lack of effect of chondrocyte-specific compared to global deletion of CCN2 in mice (which  
258 protected from OA development) suggests that CCN2 expression in other tissues, including those  
259 surrounding the tibio-femoral joint, may be required for protection from OA. Indeed, CCN2 is  
260 expressed by a number of other cells/tissues in the joint such as synovial fibroblasts (Davidson et al.,  
261 2006) and has been shown to induce OA hallmarks such as synovial fibrosis, cartilage degeneration  
262 and osteophyte formation. It is also entirely feasible that the lack of effects seen in chondrocyte-  
263 specific deletion in our studies is linked to secretion of CCN2 from these other joint tissues and its  
264 release into the joint space, thereby preventing any effects of chondrocyte-specific deletion on OA  
265 development from being observed. Other cells, including those derived from mesenchymal stem cells  
266 (MSCs) and MSC-like progenitor cells, may have also affected the levels of CCN2 in the joint. These  
267 cells are present in all joint tissues and can differentiate into several populations of cells including  
268 those with chondrogenic potential (Barry and Murphy, 2013). These cells, which are not targeted for  
269 CCN2 deletion, may have been recruited in response to lesion formation, leading to increased  
270 expression of CCN2 in the joint and subsequent loss of the KO effect on OA development.

271 It should be noted that the absence of any observable responses in our studies is not as a result of  
272 insufficient Cre recombinase activity and the subsequent deletion of CCN2 from chondrocytes. The  
273 efficiency of Cre recombinase activity for the -10kb Acan enhancer had been tested previously and  
274 shown to be effective (Cascio et al., 2014), while the new -30kb enhancer showed equally greater  
275 number of chondrocytes expressing the transgene (Li et al., 2018). To confirm the efficiency of this  
276 new Acan specific CreER<sup>T2</sup> system, Acan -30kb CreER<sup>T2</sup> with CCN2<sup>fl/fl</sup> mice were crossed with tdTomato  
277 reporter mouse, which allowed for detection of Cre recombinase activity following tamoxifen injection  
278 by visualisation of the tomato fluorescence compared to oil injected control, and confirmed  
279 recombination and hence CCN2 deletion, from all articular cartilage chondrocytes. Furthermore, the  
280 use of two different Acan-Cre systems to drive Cre-recombinase expression in chondrocytes ensured

281 any responses were independent of Cre activity targeting and were most likely a direct result of the  
282 action of CCN2 deletion.

283 In this study, we used two models of PTOA, with different severities of OA progression. The non-  
284 invasive loading of the knee has previously been shown to induce moderate OA lesions on the lateral  
285 femur (Poulet et al., 2011), whereas surgical intervention is known to lead to a higher degree of OA  
286 severity. The importance of using different models pertain to the fact that, although similar  
287 pathologies can be seen in both models, both may trigger different cellular responses linked to the  
288 severity of the disease. For example, the surgical model might trigger more severe inflammatory  
289 responses. In addition, the mechanical environment is severely affected in the surgical model  
290 throughout the whole study, whereas the traumatic loads are applied at specific and controlled times,  
291 with a maximum of 6 episodes of 7 minutes; the rest of the time, the mechanical environment is  
292 relatively normal compared to that engendered by surgical instability. In future studies, the lack of  
293 effects of chondrocyte specific CCN2 expression in adults could be tested in other models of OA,  
294 including ageing and obesity-induced OA.

295 In conclusion, this study showed through the use of two models of trauma-induced OA that CCN2  
296 expression by chondrocytes is not required for maintenance of cartilage in adults and that CCN2  
297 expression by other tissues within the joint may be more important for any effect to be observed.

298

#### 299 **Competing interests**

300 None to declare.

301

#### 302 **Funding**

303 This project was funded by two Versus Arthritis project grants (20717 & 20859).

304

#### 305 **Author contributions**

306 1) Study conception and design: BP, GBG, DA; Acquisition of data: CK, LRM, IK, PM, AL, GBG, BP. Data  
307 analysis and interpretation: CK, LRM, IK, PM, AL, DA, GBG, BP; Obtaining of funding: BP, GBG, DA.

308 2) Drafting and revision of manuscript: all authors have contributed to the draft and revision of the  
309 manuscript and their comments have been added to the final version when appropriate.

310 3) Final Approval of the Manuscript: all authors have reviewed the final version of the manuscript and  
311 approved the version to be published.

312

#### 313 **References**

- 314 BARRY, F. & MURPHY, M. 2013. Mesenchymal stem cells in joint disease and repair. *Nat Rev*  
315 *Rheumatol*, 9, 584-94.
- 316 CASCIO, L. L., LIU, K., NAKAMURA, H., CHU, G., LIM, N. H., CHANALARIS, A., SAKLATVALA, J., NAGASE,  
317 H. & BOU-GHARIOS, G. 2014. Generation of a mouse line harboring a bi-transgene expressing  
318 luciferase and tamoxifen-activatable creERT2 recombinase in cartilage. *genesis*, 52, 110-119.
- 319 DAVIDSON, E. N. B., VITTERS, E. L., MOOREN, F. M., OLIVER, N., BERG, W. B. V. D. & KRAAN, P. M. V.  
320 D. 2006. Connective tissue growth factor/CCN2 overexpression in mouse synovial lining  
321 results in transient fibrosis and cartilage damage. *Arthritis & Rheumatism*, 54, 1653-1661.
- 322 GLASSON, S. S., CHAMBERS, M. G., VAN DEN BERG, W. B. & LITTLE, C. B. 2010. The OARSI  
323 histopathology initiative - recommendations for histological assessments of osteoarthritis in  
324 the mouse. *Osteoarthritis Cartilage*, 18 Suppl 3, S17-23.
- 325 HAN, Y. & LEFEBVRE, V. 2008. L-Sox5 and Sox6 drive expression of the aggrecan gene in cartilage by  
326 securing binding of Sox9 to a far-upstream enhancer. *Mol Cell Biol*, 28, 4999-5013.
- 327 KAMEKURA, S., HOSHI, K., SHIMOAKA, T., CHUNG, U., CHIKUDA, H., YAMADA, T., UCHIDA, M., OGATA,  
328 N., SEICHI, A., NAKAMURA, K. & KAWAGUCHI, H. 2005. Osteoarthritis development in novel  
329 experimental mouse models induced by knee joint instability. *Osteoarthritis Cartilage*, 13,  
330 632-41.
- 331 KUBOTA, S. & TAKIGAWA, M. 2015. Cellular and molecular actions of CCN2/CTGF and its role under  
332 physiological and pathological conditions. *Clin Sci (Lond)*, 128, 181-96.
- 333 LI, I. M. H., LIU, K., NEAL, A., CLEGG, P. D., DE VAL, S. & BOU-GHARIOS, G. 2018. Differential tissue  
334 specific, temporal and spatial expression patterns of the Aggrecan gene is modulated by  
335 independent enhancer elements. *Scientific Reports*, 8, 950.
- 336 NISHIDA, T., KUBOTA, S., KOJIMA, S., KUBOKI, T., NAKAO, K., KUSHIBIKI, T., TABATA, Y. & TAKIGAWA,  
337 M. 2004. Regeneration of defects in articular cartilage in rat knee joints by CCN2 (connective  
338 tissue growth factor). *J Bone Miner Res*, 19, 1308-19.
- 339 NISHIDA, T., KUBOTA, S., NAKANISHI, T., KUBOKI, T., YOSIMICHI, G., KONDO, S. & TAKIGAWA, M. 2002.  
340 CTGF/Hcs24, a hypertrophic chondrocyte-specific gene product, stimulates proliferation and  
341 differentiation, but not hypertrophy of cultured articular chondrocytes. *J Cell Physiol*, 192, 55-  
342 63.
- 343 OMOTO, S., NISHIDA, K., YAMAAI, Y., SHIBAHARA, M., NISHIDA, T., DOI, T., ASAHARA, H., NAKANISHI,  
344 T., INOUE, H. & TAKIGAWA, M. 2004. Expression and localization of connective tissue growth  
345 factor (CTGF/Hcs24/CCN2) in osteoarthritic cartilage. *Osteoarthritis Cartilage*, 12, 771-8.
- 346 PERBAL, B. 2004. CCN proteins: multifunctional signalling regulators. *Lancet*, 363, 62-4.
- 347 POULET, B., HAMILTON, R. W., SHEFELBINE, S. & PITSILLIDES, A. A. 2011. Characterizing a novel and  
348 adjustable noninvasive murine joint loading model. *Arthritis Rheum*, 63, 137-47.
- 349 SHIMO, T., NISHIDA, T., NAKANISHI, T., TAKIGAWA, M., KUBO, T., KOBAYASHI, K., TEZUKA, K. &  
350 TAMATANI, T. 2000. Effects of CTGF/Hcs24, a Product of a Hypertrophic Chondrocyte-Specific  
351 Gene, on the Proliferation and Differentiation of Chondrocytes in Culture1. *Endocrinology*,  
352 141, 264-273.
- 353 TAKIGAWA, M., NAKANISHI, T., KUBOTA, S. & NISHIDA, T. 2003. Role of CTGF/HCS24/ecogenin in  
354 skeletal growth control. *J Cell Physiol*, 194, 256-66.
- 355 TANG, X., MUHAMMAD, H., MCLEAN, C., MIOTLA-ZAREBSKA, J., FLEMING, J., DIDANGELOS, A.,  
356 ONNERFJORD, P., LEASK, A., SAKLATVALA, J. & VINCENT, T. L. 2018. Connective tissue growth  
357 factor contributes to joint homeostasis and osteoarthritis severity by controlling the matrix  
358 sequestration and activation of latent TGFbeta. *Ann Rheum Dis*, 77, 1372-1380.

359

360
